# Supplementary material for: The Short-Term Effects of Amendments on Nematode Communities and Diversity Patterns under the Cultivation of Miscanthus × giganteus on Marginal Land
Source: MDPI journal article supplement (doi:10.3390/agronomy12092063), 2022-08-29
Supplement: s1 [file s1]

**Table S1.** Characteristics of amended soils.

| Parameter             | Unit                | Control       | BD1           | BD2           | D             | SS            | HW            | <i>p</i> -value |
|-----------------------|---------------------|---------------|---------------|---------------|---------------|---------------|---------------|-----------------|
| pH (H <sub>2</sub> O) | -                   | 5.65 ± 0.20 d | 8.48 ± 0.13 a | 8.48 ± 0.13 a | 8.95 ± 0.09 a | 6.18 ± 0.32 c | 7.65 ± 0.05 b | < 0.001         |
| Organic matter        | %                   | 4.60 ± 0.30 a | 3.01 ± 0.18 b | 3.32 ± 0.18 b | 3.09 ± 0.20 b | 2.90 ± 0.22 b | 3.02 ± 0.16 b | < 0.05          |
| Available P           | mg kg <sup>-1</sup> | 50.6 ± 2.00   | 40.1 ± 8.30   | 42.3 ± 8.43   | 42.9 ± 12.8   | 41.2 ± 9.59   | 39.8 ± 7.33   | 0.995           |
| Available K           | mg kg <sup>-1</sup> | 315 ± 9.80    | 279 ± 37.0    | 288 ± 37.8    | 305 ± 0.15    | 282 ± 38.9    | 289 ± 46.0    | 0.979           |
| Available Ca          | mg kg <sup>-1</sup> | 1 769 ± 80.5  | 1733 ± 131    | 1777 ± 133    | 1832 ± 189    | 1783 ± 158    | 1837 ± 141    | 0.955           |
| Available Mg          | mg kg <sup>-1</sup> | 258 ± 7.30    | 266 ± 43.3    | 275 ± 42.0    | 296 ± 64.8    | 281 ± 52.9    | 286 ± 49.1    | 0.944           |

**Table S2.** Nematode community abundance and taxonomic diversity under soil amendments application and  $M \times g$  growth.

| Taxon                                 | Control          | BD1              | BD2              | D               | SS              | HW              |
|---------------------------------------|------------------|------------------|------------------|-----------------|-----------------|-----------------|
| Pi                                    |                  |                  |                  |                 |                 |                 |
| <i>Paratylenchus projectus</i>        | 21 ± 10          | 23 ± 1           | 22 ± 11          | 29 ± 9          | 29 ± 9          | 25 ± 4          |
| <i>Paratylenchus aculeatus</i>        | 10 ± 2           | –                | –                | –               | –               | –               |
| <i>Geocenamus quadrifer</i>           | 15 ± 3           | 10 ± 2           | 14 ± 2           | 15 ± 3          | 14 ± 2          | –               |
| <i>Merlinius nothus</i>               | 17 ± 7           | 12 ± 0           | 14 ± 4           | 26 ± 2          | 10 ± 2          | –               |
| <i>Merlinius joctus</i>               | 10 ± 2           | 15 ± 3           | 19 ± 2           | –               | –               | –               |
| <i>Helicotylenchus digonicus</i>      | 14 ± 2           | 16 ± 2           | 13 ± 5           | –               | 21 ± 1          | 12 ± 12         |
| <i>Helicotylenchus pseudorobustus</i> | 10 ± 2           | 9 ± 1            | 12 ± 0           | –               | 19 ± 1          | 10 ± 10         |
| <i>Helicotylenchus vulgaris</i>       | 8 ± 2            | –                | –                | 7 ± 1           | –               | –               |
| <i>Paratrophurus hungaricus</i>       | 3 ± 1            | –                | –                | –               | –               | –               |
| <i>Pratylenchus fallax</i>            | 12 ± 12          | 25 ± 17          | 24 ± 18          | 40 ± 6          | 26 ± 2          | 66 ± 20         |
| <i>Pratylenchus thornei</i>           | 19 ± 19          | 26 ± 12          | 18 ± 12          | 24 ± 0          | 31 ± 9          | 45 ± 5          |
| <i>Acrobeloides</i>                   | 16 ± 6           | 17 ± 7           | 22 ± 12          | 14 ± 2          | 6 ± 2           | –               |
| <i>Cephalobus</i>                     | 15 ± 3           | 11 ± 1           | 11 ± 1           | 14 ± 2          | 6 ± 1           | 3 ± 1           |
| <i>Panagrolaimus</i>                  | 12 ± 4           | 11 ± 1           | 11 ± 1           | 15 ± 3          | 5 ± 1           | 2 ± 1           |
| <i>Plectus</i>                        | 13 ± 1           | 6 ± 4            | 6 ± 2            | 5 ± 1           | 14 ± 2          | 5 ± 3           |
| <i>Rhabditis</i>                      | 12 ± 0           | –                | 10 ± 10          | 15 ± 3          | –               | –               |
| <i>Aphelenchoides</i>                 | 19 ± 1           | 12 ± 0           | 24 ± 4           | 21 ± 9          | 28 ± 4          | 29 ± 8          |
| <i>Aphelenchus</i>                    | 76 ± 8           | 80 ± 46          | 36 ± 4           | 76 ± 4          | 32 ± 11         | –               |
| <i>Ditylenchus</i>                    | 50 ± 8           | 16 ± 4           | 18 ± 3           | 3 ± 1           | 35 ± 7          | –               |
| <i>Filenchus</i>                      | 19 ± 1           | 24 ± 4           | 28 ± 4           | 15 ± 3          | 17 ± 2          | 14 ± 2          |
| <i>Dorylaimus</i>                     | 10 ± 2           | 11 ± 1           | 9 ± 1            | 37 ± 5          | 5 ± 1           | 11 ± 1          |
| <i>Eudorylaimus</i>                   | 11 ± 1           | 8 ± 8            | 9 ± 9            | –               | 10 ± 2          | 11 ± 1          |
| <i>Mesodorylaimus</i>                 | 9 ± 1            | 6 ± 6            | 6 ± 6            | 5 ± 5           | –               | –               |
| <i>Enchodelus</i>                     | –                | 7 ± 1            | 8 ± 4            | –               | –               | –               |
| <i>Coomansus</i>                      | 2 ± 2            | 4 ± 2            | 4 ± 2            | 3 ± 1           | 7 ± 2           | 9 ± 2           |
| <i>Iotonchus</i>                      | 1 ± 1            | 1 ± 1            | 1 ± 1            | –               | 2 ± 2           | 2 ± 0           |
| <i>Mylonchulus</i>                    | 7 ± 1            | 5 ± 1            | 3 ± 1            | 3 ± 1           | 9 ± 4           | 7 ± 1           |
| <i>Prionchulus</i>                    | 2 ± 1            | 3 ± 1            | 2 ± 0            | 3 ± 1           | 4 ± 3           | 6 ± 2           |
| <b>Total</b>                          | <b>411 ± 101</b> | <b>357 ± 125</b> | <b>342 ± 117</b> | <b>368 ± 60</b> | <b>325 ± 65</b> | <b>254 ± 70</b> |
| Pf1                                   |                  |                  |                  |                 |                 |                 |
| <i>Paratylenchus projectus</i>        | 34 ± 9           | 28 ± 3           | 19 ± 6           | 21 ± 5          | 25 ± 8          | 22 ± 4          |
| <i>Paratylenchus aculeatus</i>        | 14 ± 3           | –                | –                | –               | –               | –               |
| <i>Geocenamus quadrifer</i>           | 22 ± 0           | 14 ± 5           | 14 ± 3           | 15 ± 2          | 12 ± 1          | –               |

|                                       |                  |                  |                  |                 |                 |                 |
|---------------------------------------|------------------|------------------|------------------|-----------------|-----------------|-----------------|
| <i>Merlinius nothus</i>               | 23 ± 4           | 20 ± 7           | 14 ± 5           | 23 ± 2          | 10 ± 2          | –               |
| <i>Merlinius joctus</i>               | 15 ± 2           | 15 ± 5           | 17 ± 4           | –               | –               | –               |
| <i>Helicotylenchus digonicus</i>      | 22 ± 0           | 20 ± 1           | 12 ± 4           | –               | 20 ± 1          | 11 ± 11         |
| <i>Helicotylenchus pseudorobustus</i> | 20 ± 1           | 10 ± 1           | 10 ± 1           | –               | 12 ± 5          | 9 ± 9           |
| <i>Helicotylenchus vulgaris</i>       | 11 ± 3           | –                | –                | 6 ± 1           | –               | –               |
| <i>Paratrophurus hungaricus</i>       | 4 ± 2            | –                | –                | –               | –               | –               |
| <i>Pratylenchus fallax</i>            | 17 ± 17          | 30 ± 15          | 24 ± 9           | 37 ± 8          | 19 ± 4          | 24 ± 11         |
| <i>Pratylenchus thornei</i>           | 20 ± 20          | 27 ± 13          | 10 ± 2           | 25 ± 0          | 24 ± 3          | 19 ± 11         |
| <i>Acrobeloides</i>                   | 21 ± 3           | 24 ± 13          | 24 ± 11          | 22 ± 0          | 5 ± 2           | –               |
| <i>Cephalobus</i>                     | 17 ± 0           | 15 ± 5           | 16 ± 6           | 20 ± 1          | 7 ± 1           | 2 ± 2           |
| <i>Panagrolaimus</i>                  | 14 ± 2           | 11 ± 2           | 14 ± 6           | 19 ± 2          | 6 ± 1           | 1 ± 0           |
| <i>Plectus</i>                        | 18 ± 2           | 3 ± 1            | 5 ± 2            | 4 ± 1           | 13 ± 5          | 2 ± 1           |
| <i>Rhabditis</i>                      | 18 ± 2           | –                | 5 ± 5            | 19 ± 6          | –               | –               |
| <i>Aphelenchoides</i>                 | 36 ± 5           | 16 ± 3           | 22 ± 6           | 21 ± 0          | 21 ± 5          | 21 ± 2          |
| <i>Aphelenchus</i>                    | 92 ± 14          | 89 ± 45          | 61 ± 5           | 90 ± 4          | 27 ± 9          | 5 ± 1           |
| <i>Ditylenchus</i>                    | 69 ± 8           | 22 ± 6           | 21 ± 2           | 6 ± 1           | 42 ± 6          | –               |
| <i>Filenchus</i>                      | 34 ± 1           | 29 ± 4           | 35 ± 4           | 20 ± 7          | 19 ± 1          | 9 ± 1           |
| <i>Dorylaimus</i>                     | 12 ± 1           | 21 ± 6           | 17 ± 1           | 42 ± 6          | 7 ± 1           | 23 ± 1          |
| <i>Eudorylaimus</i>                   | 14 ± 2           | 10 ± 10          | 9 ± 9            | –               | 12 ± 1          | 18 ± 2          |
| <i>Mesodorylaimus</i>                 | 10 ± 1           | 8 ± 8            | 9 ± 9            | 6 ± 6           | 1 ± 1           | –               |
| <i>Enchodelus</i>                     | –                | 7 ± 1            | 8 ± 4            | 1 ± 1           | –               | –               |
| <i>Coomansus</i>                      | 2 ± 2            | 3 ± 3            | 4 ± 2            | 3 ± 0           | 5 ± 1           | 5 ± 1           |
| <i>Iotonchus</i>                      | 1 ± 1            | 2 ± 2            | 2 ± 1            | –               | 2 ± 2           | 2 ± 1           |
| <i>Mylonchulus</i>                    | 8 ± 2            | 2 ± 1            | 3 ± 0            | 1 ± 0           | 6 ± 1           | 5 ± 1           |
| <i>Prionchulus</i>                    | 4 ± 2            | 1 ± 1            | 2 ± 1            | 3 ± 0           | 4 ± 3           | 3 ± 2           |
| <b>Total</b>                          | <b>565 ± 102</b> | <b>422 ± 156</b> | <b>373 ± 104</b> | <b>400 ± 49</b> | <b>295 ± 60</b> | <b>176 ± 56</b> |
| <b>Pf2</b>                            |                  |                  |                  |                 |                 |                 |
| <i>Paratylenchus projectus</i>        | 58 ± 10          | 37 ± 9           | 20 ± 2           | 18 ± 4          | 23 ± 8          | 19 ± 7          |
| <i>Paratylenchus aculeatus</i>        | 16 ± 4           | –                | –                | –               | –               | –               |
| <i>Geocenamus quadrifer</i>           | 30 ± 6           | 15 ± 5           | 11 ± 1           | 16 ± 0          | 11 ± 1          | –               |
| <i>Merlinius nothus</i>               | 32 ± 2           | 27 ± 12          | 12 ± 4           | 19 ± 1          | 9 ± 1           | –               |
| <i>Merlinius joctus</i>               | 27 ± 9           | 18 ± 5           | 16 ± 1           | –               | –               | –               |
| <i>Helicotylenchus digonicus</i>      | 33 ± 1           | 30 ± 8           | 12 ± 4           | –               | 18 ± 3          | 9 ± 9           |
| <i>Helicotylenchus pseudorobustus</i> | 27 ± 6           | 11 ± 1           | 9 ± 1            | –               | 11 ± 3          | 6 ± 6           |
| <i>Helicotylenchus vulgaris</i>       | 13 ± 3           | –                | –                | 7 ± 1           | –               | –               |
| <i>Paratrophurus hungaricus</i>       | 5 ± 1            | –                | –                | –               | –               | –               |
| <i>Pratylenchus fallax</i>            | 16 ± 16          | 32 ± 16          | 18 ± 3           | 39 ± 7          | 21 ± 4          | 49 ± 17         |

|                             |                  |                  |                  |                 |                 |                 |
|-----------------------------|------------------|------------------|------------------|-----------------|-----------------|-----------------|
| <i>Pratylenchus thornei</i> | 20 ± 20          | 33 ± 11          | 15 ± 5           | 27 ± 4          | 29 ± 9          | 34 ± 6          |
| <i>Acrobeloides</i>         | 27 ± 1           | 31 ± 19          | 36 ± 22          | 27 ± 3          | 4 ± 2           | –               |
| <i>Cephalobus</i>           | 18 ± 3           | 16 ± 4           | 18 ± 6           | 25 ± 5          | 9 ± 1           | –               |
| <i>Panagrolaimus</i>        | 17 ± 5           | 20 ± 9           | 15 ± 4           | 27 ± 3          | 7 ± 2           | –               |
| <i>Plectus</i>              | 21 ± 3           | 1 ± 1            | –                | 4 ± 2           | 16 ± 6          | –               |
| <i>Rhabditis</i>            | 19 ± 3           | –                | 9 ± 9            | 30 ± 6          | –               | –               |
| <i>Aphelenchoides</i>       | 42 ± 6           | 18 ± 4           | 22 ± 10          | 23 ± 9          | 13 ± 11         | 16 ± 2          |
| <i>Aphelenchus</i>          | 119 ± 1          | 113 ± 45         | 71 ± 1           | 115 ± 5         | 27 ± 9          | 11 ± 1          |
| <i>Ditylenchus</i>          | 70 ± 2           | 24 ± 6           | 25 ± 7           | 9 ± 3           | 59 ± 11         | –               |
| <i>Filenchus</i>            | 43 ± 1           | 43 ± 1           | 47 ± 7           | 45 ± 3          | 22 ± 2          | 6 ± 2           |
| <i>Dorylaimus</i>           | 17 ± 1           | 22 ± 2           | 17 ± 5           | 69 ± 13         | 9 ± 1           | 31 ± 1          |
| <i>Eudorylaimus</i>         | 17 ± 1           | 11 ± 11          | 10 ± 10          | –               | 20 ± 2          | 20 ± 2          |
| <i>Mesodorylaimus</i>       | 11 ± 1           | 11 ± 11          | 9 ± 9            | 6 ± 6           | –               | –               |
| <i>Enchodelus</i>           | –                | 11 ± 1           | 10 ± 4           | –               | –               | –               |
| <i>Coomansus</i>            | 3 ± 3            | 4 ± 2            | 5 ± 3            | 4 ± 0           | 5 ± 3           | 5 ± 1           |
| <i>Iotonchus</i>            | 2 ± 2            | 1 ± 1            | 1 ± 1            | –               | 1 ± 1           | 1 ± 0           |
| <i>Mylonchulus</i>          | 12 ± 0           | 5 ± 2            | 3 ± 2            | 3 ± 0           | 4 ± 2           | 5 ± 1           |
| <i>Prionchulus</i>          | 6 ± 3            | 3 ± 1            | 3 ± 1            | 4 ± 2           | 3 ± 2           | 4 ± 2           |
| <b>Total</b>                | <b>718 ± 111</b> | <b>534 ± 184</b> | <b>410 ± 118</b> | <b>515 ± 75</b> | <b>317 ± 80</b> | <b>214 ± 55</b> |

---

**Table S3.** Multivariate GLM results examining the effect of soil amendment type and sampling time on PC1–PC4 scores.

| Effect                | Wilks- $\lambda$ | F-ratio | Effect df | Error df | <i>p</i> -value | Effect size ( $\eta^2$ ) |
|-----------------------|------------------|---------|-----------|----------|-----------------|--------------------------|
| Intercept             | 0.00             | 0.00    | 4         | 15.00    | 1.00            | 1.000                    |
| Sampling time (T) *   | 0.45             | 3.05    | 8         | 30.00    | < 0.01          | 0.998                    |
| Amendment type (A) ** | 0.87             | 16.59   | 20        | 50.70    | < 0.001         | 0.999                    |
| T $\times$ A          | 0.45             | 1.22    | 40        | 58.73    | 0.24            | 0.922                    |

Note: \* Sampling time: May 21 (Pi - beginning of the vegetation), July 26 (Pf1 - middle of the vegetation), and October 30, 2021 (Pf2 - end of the vegetation); \*\* Amendment type: BD1, BD2, D, SS, and HM.

**Table S4.** Response of given nematode taxa abundance to soil amendment type and sampling time from multivariate GLMs.

| PC | Pf2/Pf1 | Pi/Pf2 | BD1 | BD2 | D | SS | HM | $R_{adj}^2$ | $p$ -value |
|----|---------|--------|-----|-----|---|----|----|-------------|------------|
| 1  | –       | –      | –   | –   | ↓ | ↑  | –  | 0.69        | < 0.001    |
| 2  | –       | ↓      | ↑   | ↑   | ↑ | ↑  | ↑  | 0.75        | < 0.001    |
| 3  | –       | ↓      | –   | –   | ↑ | ↑  | –  | 0.39        | 0.04       |
| 4  | –       | –      | –   | –   | – | –  | –  | 0.28        | 0.12       |

Note: BD1, BD2, D, SS, and HW – planned comparison with control as the second member of pairwise comparison; for planned comparison: ↓ – by results of planned comparison the abundance of taxa decreases under the influence of the first member of pairwise comparison ( $p < 0.05$ ); ↑ – by the results of planned comparison the abundance of taxa increases under the influence of the first member of pairwise comparison ( $p < 0.05$ ).

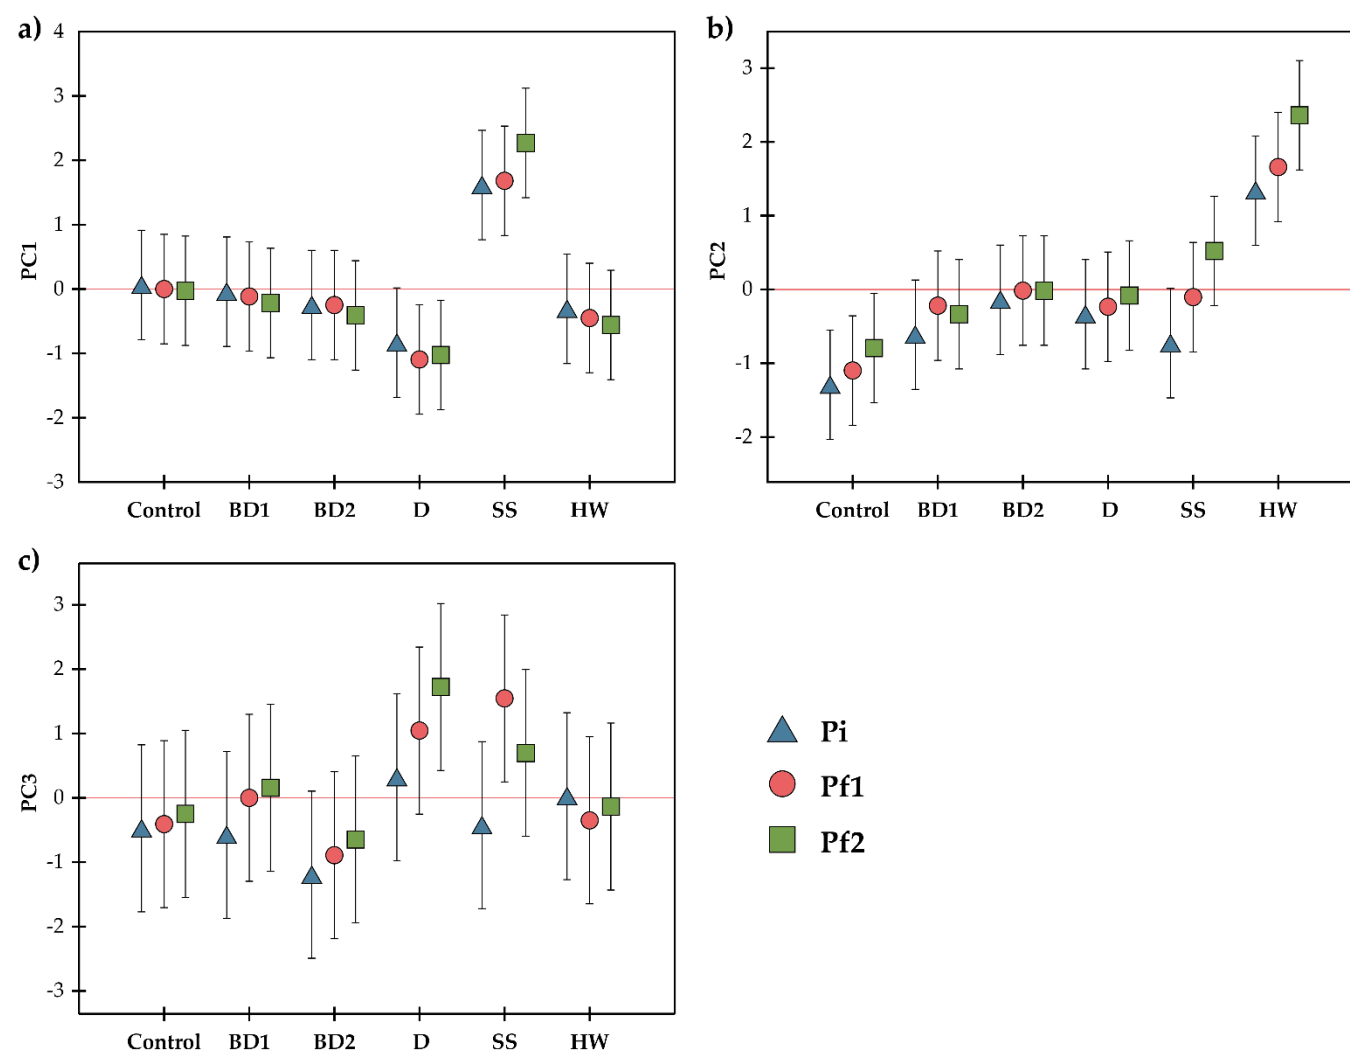

**Figure S1.** Response of PC scores to the effects of soil amendments at different sampling time: Pi, Pf1, and Pf2; amendment type: BD1, BD2, D, SS, and HW. a) PC1; b) PC2; c) PC3.

**Table S5.** Parameters of  $M \times g$  harvest value depending on the soil treatment by amendments.

| Treatment  | Fresh weight, t ha <sup>-1</sup><br><i>F</i> = 0.88, <i>p</i> = 0.51 |      |      | Dry weight, t ha <sup>-1</sup><br><i>F</i> = 0.63, <i>p</i> = 0.68 |      |      | Dry matter, %<br><i>F</i> = 1.95, <i>p</i> = 0.14 |      |      |
|------------|----------------------------------------------------------------------|------|------|--------------------------------------------------------------------|------|------|---------------------------------------------------|------|------|
|            | Mean ± SE                                                            | Min  | Max  | Mean ± SE                                                          | Min  | Max  | Mean ± SE                                         | Min  | Max  |
| Control    | 0.94 ± 0.12                                                          | 0.72 | 1.24 | 0.63 ± 0.21                                                        | 0.35 | 1.22 | 47.8 ± 1.3                                        | 45.0 | 51.0 |
| BD1        | 1.36 ± 0.40                                                          | 0.48 | 2.44 | 0.63 ± 0.18                                                        | 0.25 | 1.10 | 47.5 ± 1.7                                        | 45.0 | 52.0 |
| BD2        | 2.00 ± 0.83                                                          | 1.00 | 4.48 | 0.90 ± 0.36                                                        | 0.49 | 1.97 | 46.0 ± 1.1                                        | 44.0 | 49.0 |
| D          | 1.17 ± 0.33                                                          | 0.52 | 1.88 | 0.55 ± 0.15                                                        | 0.25 | 0.88 | 47.0 ± 0.4                                        | 46.0 | 48.0 |
| SS         | 0.97 ± 0.27                                                          | 0.52 | 1.72 | 0.47 ± 0.12                                                        | 0.27 | 0.81 | 48.8 ± 0.9                                        | 47.0 | 51.0 |
| HW         | 1.10 ± 0.11                                                          | 0.88 | 1.40 | 0.48 ± 0.04                                                        | 0.40 | 0.57 | 44.3 ± 1.1                                        | 41.0 | 46.0 |
| All groups | 1.26 ± 0.17                                                          | 0.48 | 4.48 | 0.61 ± 0.08                                                        | 0.25 | 1.97 | 46.9 ± 0.5                                        | 41.0 | 52.0 |
